# Supplementary material for: LIN28B induces a differentiation program through CDX2 in colon cancer
Source: JCI Insight. 2021 May 10;6(9):e140382. doi: 10.1172/jci.insight.140382 (PMC8262288; doi:10.1172/jci.insight.140382)
Supplement: Supplemental data [file jciinsight-6-140382-s223.pdf]

## Supplemental Figures and legends

**A**

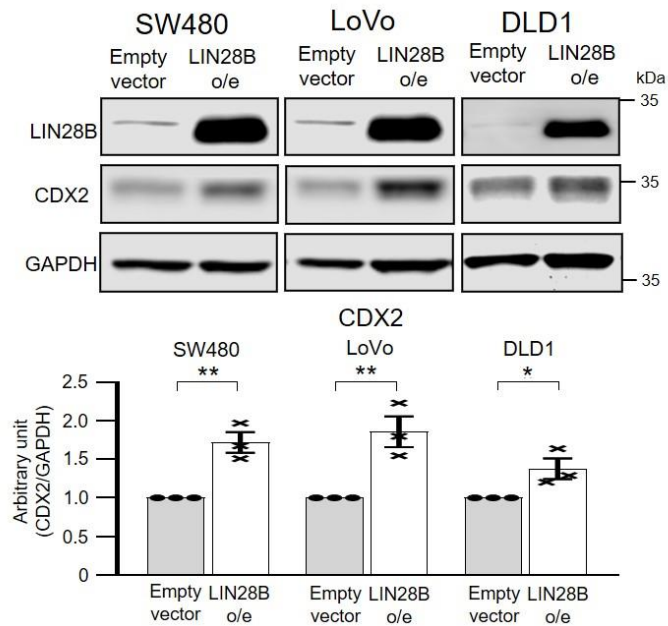

**B**

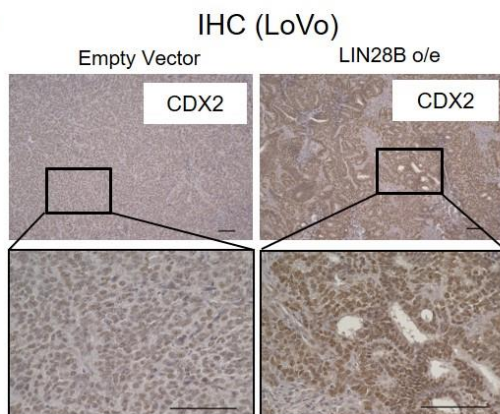

**C**

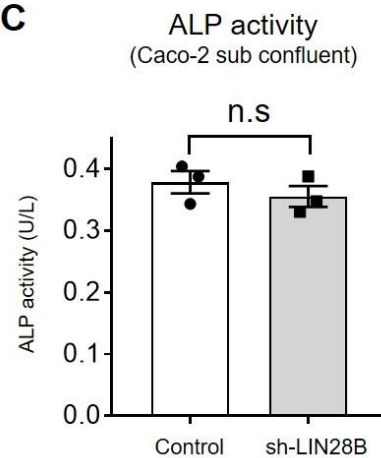

**Supplemental Figure 1. LIN28B upregulates CDX2 expression in colorectal cancer cell lines. (A) Upper:** WB analysis of LIN28B and CDX2 in SW480/LoVo/DLD1 control (Empty Vector) and LIN28B overexpression (o/e) cells. **Lower:** Band intensities were normalized by densitometry to GAPDH. (n=3) **(B)** Representative IHC staining for CDX2 in the subcutaneous xenograft tumor of LoVo cells with control or LIN28B KD. Scale bars, 100µm. **(C)** ALP activity assay in sub confluent Caco-2 cells. (n=3) Data are presented as mean ± SEM. Unpaired, two-tailed student's t-test was performed. (\*) p < 0.05, (\*\*) p < 0.01.

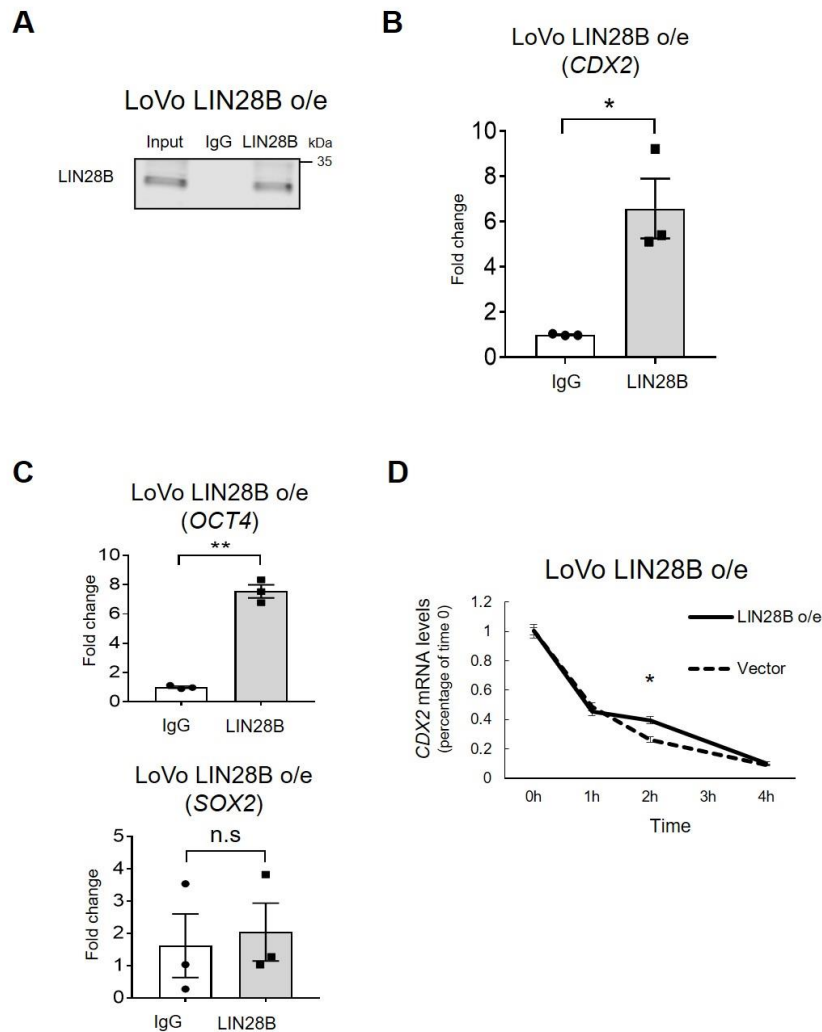

**Supplemental Figure 2. LIN28B stabilizes CDX2 mRNA through direct binding.** (A) Quality check of RNA immunoprecipitation (RIP) assay: analysis of LIN28B expression level by WB. The results of RIP assay by qRT-PCR of RIP materials for CDX2 (B), OCT4 (C: upper) and SOX2 (C: lower) (n=3) (D) mRNA stability assay in LoVo control and LIN28B overexpression. (n=3) Data are presented as mean  $\pm$  SEM. Unpaired, two-tailed student's t-test (B-D) was performed. (\*)  $p < 0.05$ , (\*\*)  $p < 0.01$ .

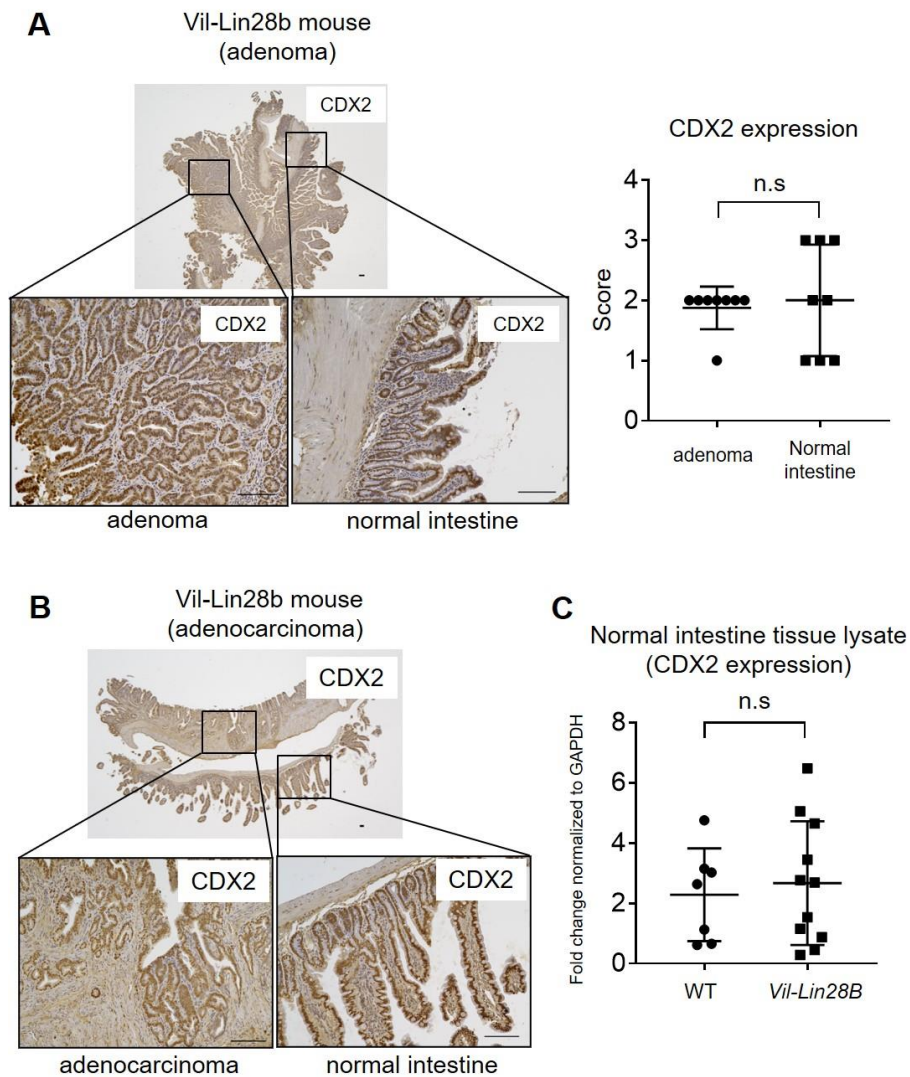

**Supplemental Figure 3. CDX2 expression is maintained during tumorigenesis in LIN28B expressing transgenic**

**mice. (A) Left:** Representative IHC staining for CDX2 in an adenoma in *Vil-LIN28B* mice; **Right:** The score of CDX2 expression in adenomas and paired normal intestine in *Vil-LIN28B* mice. (n=8) **(B)** Representative IHC staining for CDX2 in an adenocarcinoma in *Vil-LIN28B* mice. **(C)** The graph indicates CDX2 expression in normal intestine of *Vil-LIN28B* mice (n=11) and WT (n=7) mice by western blotting analysis. (n=7) Data are presented as mean  $\pm$  SD. Unpaired, two-tailed student's t-test **(A and C)** was performed.

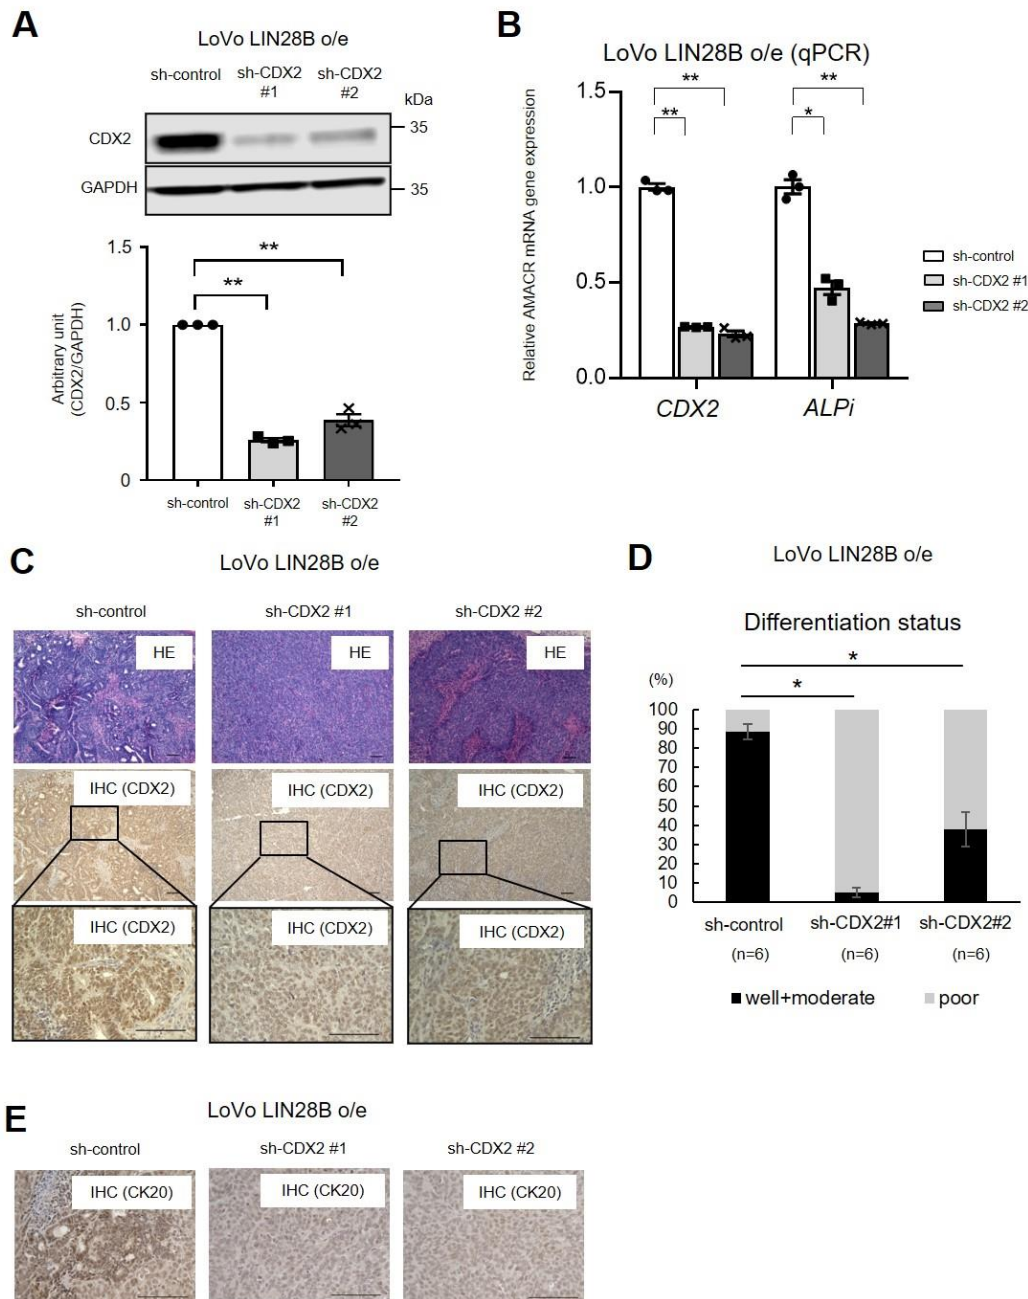

**Supplemental Figure 4. CDX2 regulates CRC tumor differentiation in the context of LIN28B overexpression. (A)** WB showing CDX2 knockdown using shCDX2 in LoVo cells. Lower graph shows the densitometry normalized by GAPDH. (n=3) **(B)** CDX2 and ALPi expression (qPCR) in LoVo control/CDX2 KD cells (n=3). **(C)** Representative IHC in the subcutaneous xenograft tumor of LoVo cells with control or CDX2 KD for H&E (first panels), IHC of CDX2 (second and third panels). Scale bar, 100µm. **(D)** Cumulative ratio of differentiation status in subcutaneous xenograft tumors (n=6 per cell type). **(E)** Representative CK20 IHC in the subcutaneous xenograft tumor of LoVo cells with control or CDX2 KD. Scale bar, 100µm. Data are presented as mean  $\pm$  SEM. One-way ANOVA followed by Dunnett's multiple comparisons test as post hoc analysis (**A**, **B** and **D**) was performed. (\*)  $p < 0.05$ , (\*\*)  $p < 0.01$ .

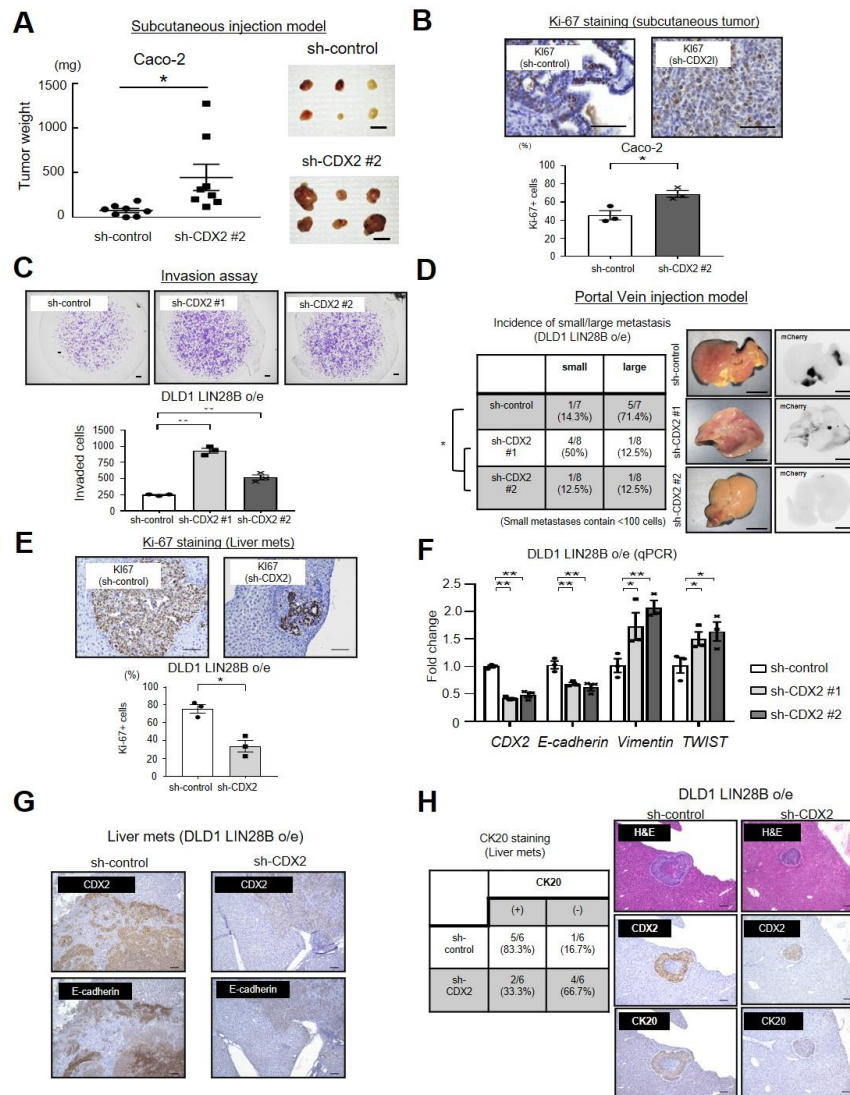

**Supplemental Figure 5. CDX2 promotes metastatic CRC tumor colonization through mesenchymal-epithelial transition.** (A) **Left:** Subcutaneous xenograft experiments with Caco-2 cells (n=6 per cell type) show a significant increase in tumor weight with CDX2 knockdown ( $447.00 \pm 147.00$  mg at sacrifice) as compared to control cells ( $75.63 \pm 22.24$  mg at sacrifice). **Right:** the images of tumors (Scale bar, 10 mm). (B) Ki-67 staining in the subcutaneous xenograft tumor of DLD1 cells with control or CDX2 KD, representative images (**upper**) and the quantification (**lower**). Scale Bars: 100µm. (n=3) (C) Transwell chamber invasion assay of DLD1 cells with control or CDX2 KD, representative images (**upper**) and the quantification (**lower**). Scale Bars: 100µm. (n=3) (D) **Left:** Frequency of small/large liver metastases in DLD1 control or CDX2 KD groups. **Right;** Representative liver images. (left: bright field, right: images with mCherry signal.) Scale Bars: 10mm. (E) Ki-67 staining in the liver metastatic tumor of DLD1 cells with control or CDX2 KD, representative images (**upper**) and the quantification (**lower**). Scale Bars: 100µm. (n=3) (F) Epithelial-mesenchymal transition (EMT) markers expression (qPCR) in DLD1 control/CDX2 KD cells (n=3). (G) Representative IHC of CDX2 and E-cadherin in the liver metastatic tumor of DLD1 cells with control or CDX2 KD. (H) **Left:** Frequency of CK20 positive liver metastases in DLD1 control or CDX2 KD groups. **Right;** Representative H&E and IHC staining (CDX2 and CK20). Scale Bars: 100µm. Data are presented as mean  $\pm$  SEM. Unpaired, two-tailed student's t-test (A, B and E), One-way ANOVA followed by Dunnett's multiple comparisons test as post hoc analysis (C and F) or Chi-square test (D) was performed. (\*)  $p < 0.05$ , (\*\*)  $p < 0.01$ .

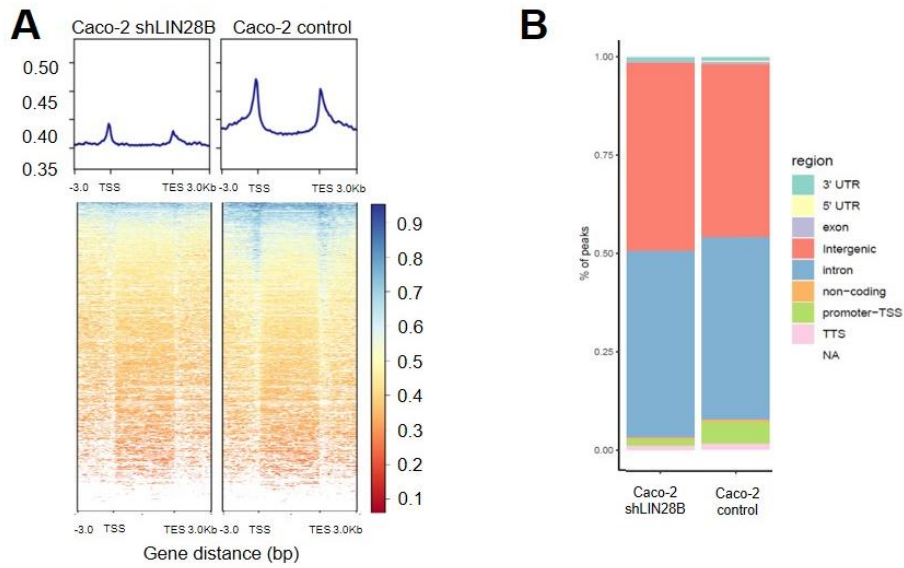

**Supplemental Figure 6. CDX2 ChIP-seq identifies AMACR as a novel target for**

**CDX2 in the context of LIN28B overexpression. (A)**Heat maps of CDX2 ChIP-seq in

Caco-2 cells with control or LIN28B knockdown. **(B)** The annotated site of Peak

analysis in CDX2 ChIP-seq.

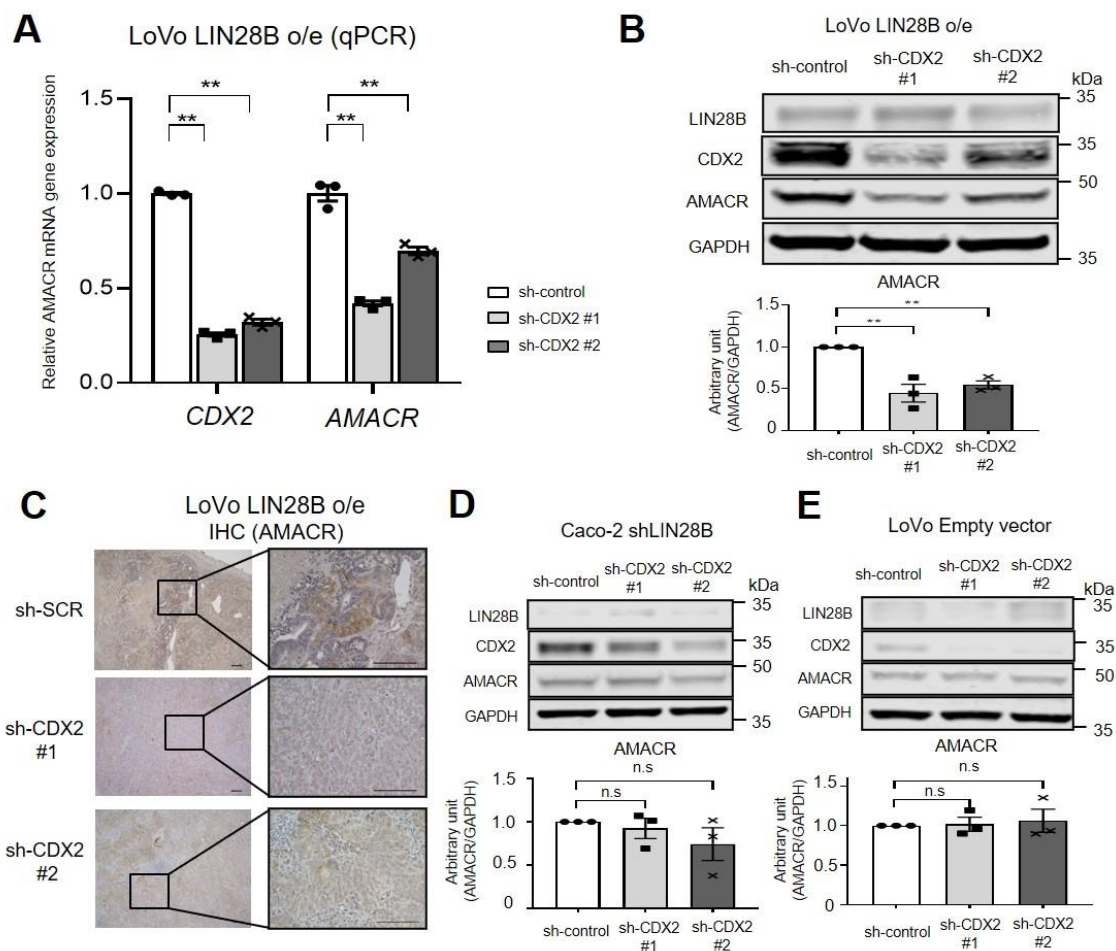

**Supplemental Figure 7. CDX2 expression has a positive correlation with AMACR expression in CRC in the context of LIN28B overexpression.** (A) CDX2 and AMACR expression (qPCR) in LoVo LIN28B o/e and CDX2 KD cells. (n=3) (B) **Upper:** WB analysis of CDX2 and AMACR in LoVo LIN28B o/e and CDX2 KD cells. **Lower:** Band intensities were normalized by densitometry to GAPDH. (n=3) (C) Representative IHC staining for AMACR in the subcutaneous xenograft tumor of LoVo LIN28B o/e cells with control or CDX2 KD. Scale bars, 100µm. (D) **Upper:** WB analysis of CDX2 and AMACR in Caco-2 cell with both LIN28B and CDX2 KD. **Lower:** Band intensities were normalized by densitometry to GAPDH. (n=3) (E) **Upper:** WB analysis of CDX2 and AMACR in LoVo cells with control and CDX2 KD cells. **Lower:** Band intensities were normalized by densitometry to GAPDH. (n=3) Data are presented as mean  $\pm$  SEM. One-way ANOVA followed by Dunnett's multiple comparisons test as post hoc analysis (A, B, D and E) was performed. (\*)  $p < 0.05$ , (\*\*)  $p < 0.01$

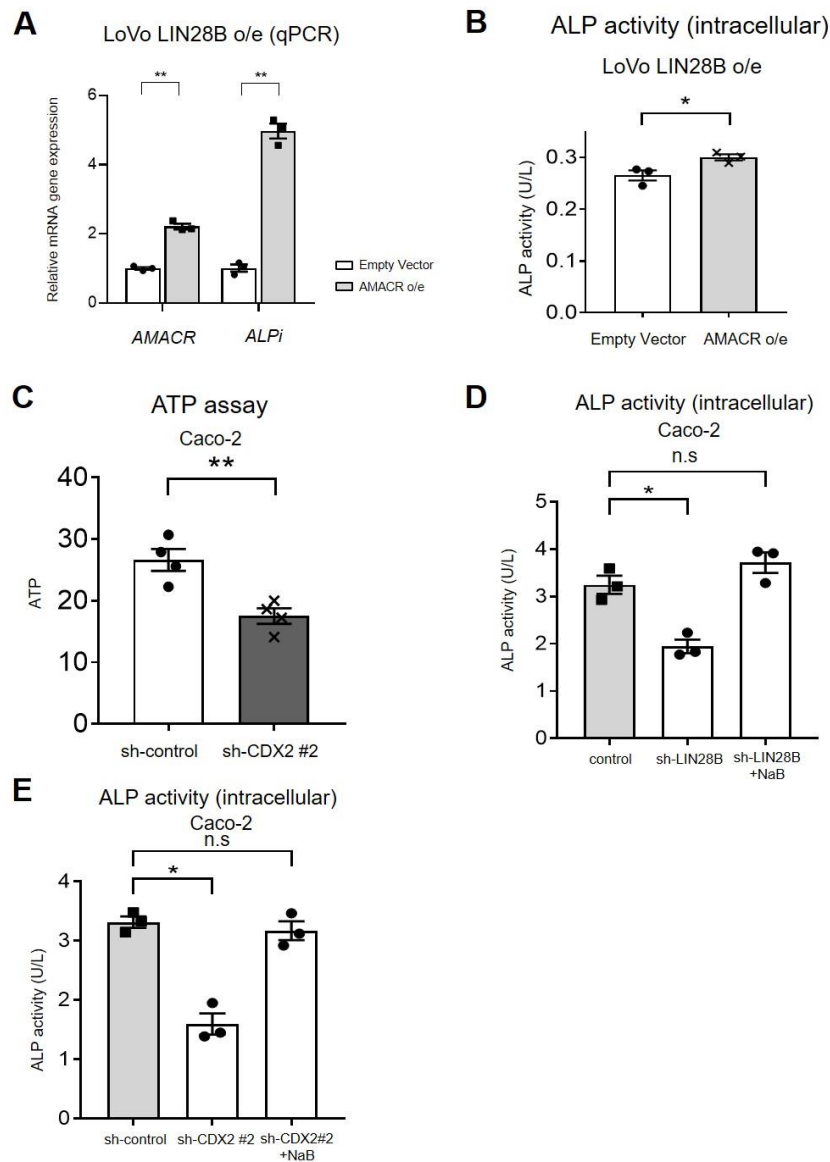

**Supplemental Figure 8. AMACR enhances ALPi expression and activity in CRC cells in the context of LIN28B overexpression.** (A) *AMACR* and *ALPi* expression (qPCR) in LoVo LIN28B o/e with Empty Vector/*AMACR* o/e. (n=3) (B) ALP activity assay in LoVo LIN28B o/e with Empty Vector/*AMACR* o/e. (n=3) (C) ATP assay in Caco-2 with CDX2 knockdown. (n=4) (D) ALP activity assay in Caco-2 control/LIN28B cells with/without sodium butyrate (Na-B). (n=4) (E) ALP activity assay in Caco-2 control/CDX2 KD cells with/without sodium butyrate (Na-B). (n=3) Data are presented as mean  $\pm$  SEM. Unpaired, two-tailed student's t-test (A, B and C), One-way ANOVA followed by Dunnett's multiple comparisons test as post hoc analysis (D and E) was performed. (\*)  $p < 0.05$ , (\*\*)  $p < 0.01$ .

## Supplemental Tables

**Supplemental Table 1. Primer sequences for qPCR**

|             |                                                                   |
|-------------|-------------------------------------------------------------------|
| hCDX2       | Forw: CAGTCGCTACATCACCATCCG<br>Rev: TTTCCTCTCCTTTGCTCTGCG         |
| hOCT4       | Forw: GCCGGTTACAGAACCACACT<br>Rev: GTGGAGGAAGCTGACAACAA           |
| hSOX2       | Forw: TACAGCATGATGCAGGACCA<br>Rev: CCGTTCATGTAGGTCTGCGA           |
| hAMACR      | Forw: AAATGGTTATCATTAGGGCTTTTGA<br>Rev: TTCCTTTTTCACTAGAACCCATTCA |
| hGAPDH      | Forw: TCAAGAAGGTGGTGAAGCAG<br>Rev: AAAGGTGGAGGAGTGGGTGT           |
| hALPi       | Forw: TGAGGGTGTGGCTTACCAG<br>Rev: TCCACGAAGAGGTAGAAG              |
| hKLF4       | Forw: CACCTGGCGAGTCTGACAT<br>Rev: GTCGCTTCATGTGGGAGAG             |
| hMUC2       | Forw: CAGCACCGATTGCTGAGTTG<br>Rev: GCTGGTCATCTCAATGGCAG           |
| hATOH1      | Forw: CCTTCCAGCAAACAGGTGAAT<br>Rev: TTGTTGAACGACGGGATAACAT        |
| hNGN3       | Forw: CTAAGAGCGAGTTGGCACTGA<br>Rev: GAGGTTGTGCATTCGATTGCG         |
| hE-cadherin | Forw: TGCCCAGAAAATGAAAAAGG<br>Rev: GTGTATGTGGCAATGCGTTC           |
| hVimentin   | Forw: GAGAACTTTGCCGTTGAAGC<br>Rev: GCTTCCTGTAGGTGGCAATC           |
| hTwist      | Forw: GGAGTCCGCAGTCTTACGAG<br>Rev: TCTGGAGGACCTGGTAGAGG           |

**Supplemental Table 2. Antibodies Used for IHC and Western Blots**

| <b>Antibodies for IHC</b>           |                |             |                        |                 |                  |
|-------------------------------------|----------------|-------------|------------------------|-----------------|------------------|
| <b>Antigen/Gene</b>                 | <b>Species</b> | <b>Type</b> | <b>Source and Cat#</b> | <b>Dilution</b> | <b>Detection</b> |
| For in vivo experiments             |                |             |                        |                 |                  |
| Human LIN28B                        | Rabbit         | pAb         | Cell Sig. Tech. #4196  | 1:1000          | IHC              |
| Mouse Lin28b                        | Rabbit         | pAb         | Cell Sig. Tech. #5422  | 1:500           | IHC              |
| CDX2                                | Rabbit         | mAb         | Abcam ab76541          | 1:1000          | IHC              |
| AMACR                               | Rabbit         | pAb         | Sigma HPA020912        | 1:20            | IHC              |
| CK20                                | Rabbit         | pAb         | Bioss bs-1588R         | 1:400           | IHC              |
| E-cadherin                          | Rabbit         | mAb         | Cell Sig. Tech. #3195  | 1:500           | IHC              |
| Ki-67                               | Mouse          | mAb         | BD Pharmingen          | 1:400           | IHC              |
| For human TMAs                      |                |             |                        |                 |                  |
| LIN28B                              | Rabbit         | pAb         | Sigma HPA061745        | 1:200           | IHC              |
| CDX2                                | Rabbit         | mAb         | Cell Marque #EPR2764Y  | Prediluted      | IHC              |
| AMACR<br>P504s(13H4)                | Rabbit         | mAb         | Cell Marque # 504R     | 1:50            | IHC              |
| <b>Antibodies for Western Blots</b> |                |             |                        |                 |                  |
| <b>Gene</b>                         | <b>Species</b> | <b>Type</b> | <b>Source and Cat#</b> | <b>Dilution</b> | <b>Detection</b> |
| CDX2                                | Rabbit         | mAb         | Abcam ab76541          | 1:1000          | near-IR Fluor.   |
| LIN28B                              | Rabbit         | pAb         | Cell Sig. Tech. #4196  | 1:5000          | near-IR Fluor.   |
| CK20                                | Rabbit         | pAb         | Bioss bs-1588R         | 1:1000          | near-IR Fluor.   |
| AMACR                               | Rabbit         | pAb         | Sigma HPA020912        | 1:500           | near-IR Fluor.   |
| GAPDH                               | Mouse          | mAb         | Millipore Mab374       | 1:10,000        | near-IR Fluor.   |
